# Supplementary material for: Birnessite-type MnO2nanosheet arrays with interwoven arrangements on vapor grown carbon fibers as hybrid nanocomposites for pseudocapacitors
Source: Royal Society of Chemistry journal article supplement (doi:10.1039/c6dt03751h), 2016-01-01
Supplement: c6dt03751h1.pdf [file c6dt03751h1.pdf]

Electronic Supplementary Information

**Birnessite-type MnO<sub>2</sub> nanosheet arrays with interwoven arrangements on  
vapor grown carbon fibers as hybrid nanocomposite for pseudocapacitors**

S. Chandra Sekhar, Goli Nagaraju, Sung Min Cha and Jae Su Yu\*

*Department of Electronics and Radio Engineering, Institute for Wearable Convergence  
Electronics, Kyung Hee University, 1 Seocheon-dong, Giheung-gu, Yongin-si, Gyeonggi-do 446-  
701, Republic of Korea.*

\*Address correspondence to [jsyu@khu.ac.kr](mailto:jsyu@khu.ac.kr)

Tel: +82-31-201-3820; Fax: +82-31-206-2820

Table S1. Comparative electrochemical performance of synthesized MnO<sub>2</sub>@VCFs with previously reported materials using the three-electrode system.

| Electrode material                               | Synthesis method                   | Electrolyte                           | Test condition | Specific capacitance | Reference |
|--------------------------------------------------|------------------------------------|---------------------------------------|----------------|----------------------|-----------|
| MnO <sub>2</sub> @carbon fiber nanocables        | Hydrothermal approach              | 1 M Na <sub>2</sub> SO <sub>4</sub>   | 0.5 A/g        | ~ 58.28 F/g          | [S1]      |
| Cobalt-doped MnO <sub>x</sub> thin film          | Pulsed laser deposition            | 1 M Na <sub>2</sub> SO <sub>4</sub>   | 5 mV/s         | ~ 99 F/g             | [S2]      |
| MnO <sub>2</sub> @carbon fiber paper             | Redox-reaction mediated method     | 1 M Na <sub>2</sub> SO <sub>4</sub>   | 0.5 A/g        | ~ 106.4 F/g          | [S3]      |
| Au-MnO <sub>2</sub> /CNT coaxial arrays          | Electrodeposition/infiltration/CVD | 0.1 M Na <sub>2</sub> SO <sub>4</sub> | 10 mV/s        | ~ 68 F/g             | [S4]      |
| MnO <sub>2</sub> @wood derived biochar composite | Pyrolysis/oven growth method       | 1 M Na <sub>2</sub> SO <sub>4</sub>   | 0.5 A/g        | ~ 81 F/g             | [S5]      |
| MnO <sub>2</sub> @carbonaceous aerogel           | Hydrothermal process               | 6 M KOH                               | 0.5 A/g        | ~ 106.4 F/g          | [S6]      |
| rGO@MnO <sub>2</sub> composite                   | Redox-reaction mediated method     | 1 M Na <sub>2</sub> SO <sub>4</sub>   | 10 mV/s        | ~ 101 F/g            | [S7]      |
| MnO <sub>2</sub> @VCFs                           | Wet-chemical approach              | 1 M Na <sub>2</sub> SO <sub>4</sub>   | 0.5 A/g        | ~ 115.3 F/g          | This work |

References:

- S1. D. Zhang, Y. Zhang, Y. Luo and P. K. Chu, *Nano Energy*, 2015, 13, 47-57.
- S2. D. Yang, *J. Power Sources*, 2012, 198, 416-422.
- S3. Y. Luo, J. Jiang, W. Zhou, H. Yang, J. Luo, X. Qi, H. Zhang, D. Y. W. Yu, C. M. Li and T. Yu, *J. Mater. Chem.*, 2012, 22, 8634-8640.
- S4. A. L. M. Reddy, M. M. Shaijumon, S. R. Gowda and P. M. Ajayan, *J. Phys. Chem. C*, 2010, 114, 658-663.
- S5. C. Wan, Y. Jiao and J. Li, *RSC Adv.*, 2016, 6, 64811-64817.

S6. Y. Ren, Q. Xu, J. Zhang, H. Yang, B. Wang, D. Yang, J. Hu and Z. Liu, *Acs. Appl. Mater. Interfaces.*, 2014, 6, 9689-9697.

S7. S.-W. Lee, S.-M. Bak, C.-W. Lee, C. Jaye, D. A. Fischer, B.-K. Kim, X.-Q. Yang, K.-W. Nam and K.-B. Kim, *J. Phys. Chem. C*, 2014, 118, 2834-2843.
